# Supplementary material for: Topoisomerase 1 Activity Is Reduced in Response to Thermal Stress in Fruit Flies and in Human HeLa Cells
Source: MDPI journal article supplement (doi:10.3390/bios13110950), 2023-10-24
Supplement: s1 [file s1]

# Topoisomerase 1 Activity Is Reduced in Response to Thermal Stress in Fruit Flies and in Human HeLa Cells

Trine Juul-Kristensen <sup>1,†</sup>, Josephine Geertsens Keller <sup>1,†</sup>, Kathrine Nygaard Borg <sup>1,2</sup>, Noriko Y. Hansen <sup>1</sup>, Amalie Foldager <sup>1</sup>, Rasmus Ladegaard <sup>1</sup>, Yi-Ping Ho <sup>2,3,4,5</sup>, Volker Loeschcke <sup>6,\*</sup> and Birgitta R. Knudsen <sup>1,\*</sup>

<sup>1</sup> Department of Molecular Biology and Genetics, Aarhus University, 8000 Aarhus, Denmark; tjk@mbg.au.dk (T.J.-K.); jgk@mbg.au.dk (J.G.K.); kborg@link.cuhk.edu.hk (K.N.B.); noriko@mbg.au.dk (N.Y.H.); afo@clin.au.dk (A.F.); ladegaardmadsen@gmail.com (R.L.)

<sup>2</sup> Department of Biomedical Engineering, The Chinese University of Hong Kong, Hong Kong SAR, China; ypho@cuhk.edu.hk

<sup>3</sup> Centre for Biomaterials, The Chinese University of Hong Kong, Hong Kong SAR, China

<sup>4</sup> Hong Kong Branch of CAS Center for Excellence in Animal Evolution and Genetics, Hong Kong SAR, China

<sup>5</sup> State Key Laboratory of Marine Pollution, City University of Hong Kong, Hong Kong SAR, China

<sup>6</sup> Department of Biology, Aarhus University, 8000 Aarhus, Denmark

\* Correspondence: volker@bio.au.dk (V.L.); brk@mbg.au.dk (B.R.K.)

† These authors contributed equally to the presented work.

## 1. Supplementary Figures

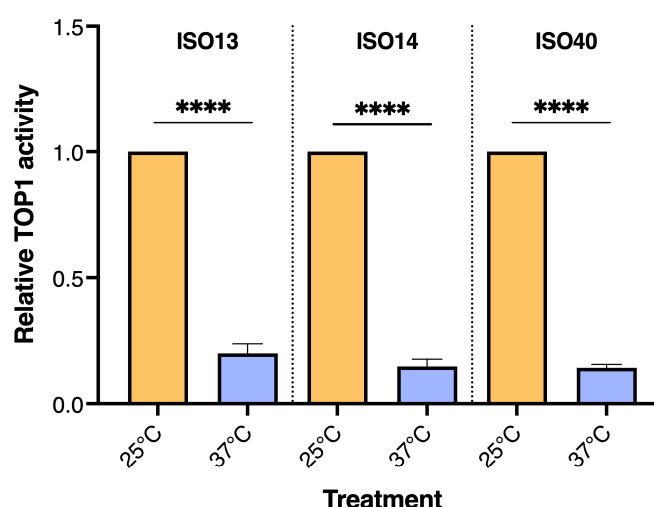

**Figure S1.** TOP1 activity in *D. melanogaster* strains after exposure to acute/short-term heat stress. Graphical depiction of TOP1 activity measured by REEAD in extract from a group of eight male flies from either ISO13, ISO14, or ISO40 strain. The flies were exposed 25°C or to acute/short-term heat stress at 37°C for 2 hours followed by 1 hour of recovery at 25°C, n=5. Data are normalized to the unstressed group at 25°C for each separate strain and plotted at mean +/- SEM. \* Indicates significant differences, \*\*\*\* p<0.0001.

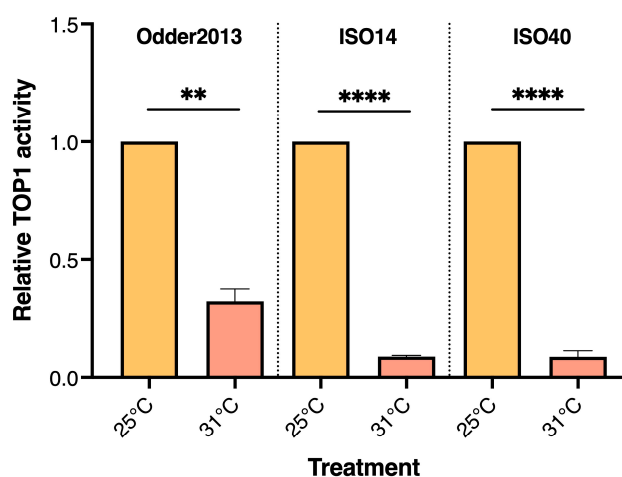

**Figure S2.** TOP1 activity in *D. melanogaster* strains after exposure to long-term heat stress. Graphical depiction of TOP1 activity measured by REEAD in extract from a group of eight male flies from either Odder2013, ISO14, or ISO40 strain. The flies were exposed to 25°C or long-term heat stress at 31°C for six days followed by 1 hour of recovery at 25°C,  $n=4$ . Data are normalized to the unstressed group at 25°C for each separate strain and plotted at mean  $\pm$  SEM. \* Indicates significant differences, \*\*  $p<0.005$ ; \*\*\*\*  $p<0.0001$ .
